1 **Information flows from hippocampus to cortex during replay of verbal working**  
2 **memory items.**

3

4 Vasileios Dimakopoulos<sup>1</sup>, Lennart Stieglitz<sup>1</sup>, Pierre Mégevand<sup>2,3</sup>, Johannes  
5 Sarnthein<sup>1,4\*</sup>

6

7 1 Klinik für Neurochirurgie, Universitätsspital Zürich, Universität Zürich, 8091 Zurich,  
8 Switzerland

9 2 Département des neurosciences fondamentales, Faculté de médecine, Université  
10 de Genève, Geneva, Switzerland

11 3 Service de neurologie, Hôpitaux Universitaires de Genève, Geneva, Switzerland

12 4 Neuroscience Center Zurich, ETH Zurich, 8092 Zurich, Switzerland

13

14 [vasileios.dimakopoulos@usz.ch](mailto:vasileios.dimakopoulos@usz.ch)

15 [lennart.stieglitz@usz.ch](mailto:lennart.stieglitz@usz.ch)

16 [pierre.megevand@unige.ch](mailto:pierre.megevand@unige.ch)

17 [johannes.sarnthein@usz.ch](mailto:johannes.sarnthein@usz.ch)

18 \*Correspondence should be addressed to J.S.

19

20 **Keywords:** Granger causality, phase-locking value, auditory cortex, posterior cortex,  
21 beta rhythm

22        **ABSTRACT**

23        **Background:** The maintenance of items in working memory (WM) relies on a  
24        widespread network of cortical areas and hippocampus where synchronization  
25        between electrophysiological recordings reflects functional coupling. We investigated  
26        the direction of information between sensory areas and hippocampus during  
27        encoding and maintenance of WM items.

28        **Methods:** Participants (N=15) performed a WM task where a string of letters was  
29        presented all at once, thus separating the encoding period from the maintenance  
30        period. Participants mentally replayed the letters during maintenance. We recorded  
31        sEEG from the hippocampus, scalp EEG and, additionally in 3 participants, temporo-  
32        parietal ECoG.

33        **Results:** When analyzing the information flow to and from auditory cortex by  
34        Granger causality, the flow was from ECoG over auditory cortex to hippocampus  
35        with a peak in the 12-24 Hz beta range while letters were presented, and this flow  
36        was subsequently reversed during maintenance, while letters were maintained in  
37        memory. The same pattern appeared to and from hippocampus with ECoG over  
38        temporo-parietal cortex. For scalp EEG, the pattern appeared on temporal sites,  
39        albeit in the 4-12 Hz theta-alpha range. While the pattern was significantly structured  
40        for correct trials, it was unstructured for incorrect trials.

41        **Conclusions:** The functional interaction between hippocampus and cortex and  
42        the reversal of information flow provide a physiological basis for the encoding of  
43        memory items and their active replay during maintenance.

44

## 45        **SIGNIFICANCE STATEMENT**

46        How do we encode and recall memories to guide action within seconds? Here, we  
47        investigated electrical activity in hippocampus and cortex while the participants  
48        mentally replayed a set of letters to maintain them working memory with the aim to  
49        respond correctly. We found clear evidence that during the encoding of the letters,  
50        the information flow was from sensory cortex to hippocampus (bottom-up). The flow  
51        was subsequently reversed during maintenance (top-down), thus providing a  
52        physiological basis for the recall of the memory items. This functional interaction  
53        provides the first evidence of bidirectional communication during encoding and the  
54        active replay of memory items.

## 55        **INTRODUCTION**

56        Working memory (WM) describes our capacity to represent sensory input for  
57        prospective use (1, 2). Maintaining content in WM requires collaboration within a  
58        widespread network of brain regions. The anatomical basis of WM was shown  
59        noninvasively with EEG / MEG (3-9) and invasively with intracranial EEG (10-19) and  
60        single unit recordings (19-22).

61        In cortical brain regions, WM maintenance correlates with sustained neuronal  
62        oscillations, most frequently reported in the theta-alpha range (4-12 Hz) (3, 5-7, 10,  
63        11, 13, 19, 23). Also in the hippocampus, WM maintenance was associated with  
64        sustained theta-alpha oscillations (14, 19). As a hallmark for WM maintenance,  
65        persistent neuronal firing was reported during the absence of sensory input,  
66        indicating the involvement of the medial temporal lobe in WM (19-21).

67        At the network level, synchronized oscillations have been proposed as a  
68        mechanism for functional interactions between brain regions (24, 25). It is thought  
69        that these oscillations show temporal coupling of the low-frequency phase for long-  
70        range communication between cortical areas (4, 6, 13, 17-19, 26). This  
71        synchronization suggests an active maintenance process through reverberating  
72        signals between brain regions.

73        We here extend previous studies with the same task (3), which had shown parietal  
74        activation and strong scalp EEG synchronization between stereotactic EEG (sEEG)  
75        in the hippocampus and scalp EEG (19). In addition to scalp EEG and hippocampal  
76        sEEG, three participants of this study had cortical recordings (ECoG) from

77 electrodes over primary auditory, parietal and occipital cortical areas. Given the low  
78 incidence of the epileptogenic zone in parietal cortex, parietal ECoG recordings are  
79 rare. We found that the information flow was from sensory areas to hippocampus  
80 during the encoding of WM items and the flow was from hippocampus to cortex for  
81 the replay of the items during the maintenance period.

## 82 **RESULTS**

### 83 **Task and behavior**

84 Fifteen participants (median age 29 y, range [18-56], 7 male) performed a  
85 modified Sternberg WM task (71 sessions in total, 50 trials each). In the task, items  
86 were presented all at once rather than sequentially, thus separating the encoding  
87 period from the maintenance period. In each trial, the participant was instructed to  
88 memorize a set of 4, 6 or 8 letters presented for 2 s (encoding). The number of  
89 letters was thus specific for the memory workload. The participants read the letters  
90 themselves and heard them spoken at the same time. After a delay (maintenance)  
91 period of 3 s, a probe letter prompted the participant to retrieve their memory  
92 (retrieval) and to indicate by button press (“IN” or “OUT”) whether or not the probe  
93 letter was a member of the letter set held in memory (**Fig. 1a**). During the  
94 maintenance period, participants rehearsed the verbal representation of the letter  
95 strings subvocally, i.e. mentally replayed the memory items. This activation of the  
96 phonological loop (1) is a component of verbal WM as it serves to produce an  
97 appropriate behavioral response (2).

98 The mean correct response rate was 91% (both for IN and OUT trials). The rate of  
99 correct responses decreased with set size from a set size of 4 (97% correct  
100 responses) to set sizes of 6 (89%) and 8 (83%) (**Fig. 1 b**). Across the participants,  
101 the memory capacity averaged 6.1 (Cowan’s K, (correct IN rate + correct OUT rate -  
102 1)\*set size), which indicates that the participants were able to maintain at least 6  
103 letters in memory. The mean response time (RT) for correct trials (3045 trials) was  
104  $1.1 \pm 0.5$  seconds and increased with workload from set size 4 ( $1.1 \pm 0.5$  s) to 6 ( $1.2$   
105  $\pm 0.5$  s) and 8 ( $1.3 \pm 0.6$  s), 53 ms/item (**Fig. 1 c**). Correct IN/OUT decisions were  
106 made more rapidly than incorrect decisions ( $1.1 \pm 0.5$  versus  $1.3 \pm 0.6$  seconds).  
107 These data show that the participants performed well in the task and that the  
108 difficulty of the trials increased with the number of letters in the set. In further

109 analysis, we focused on correct trials with set size 6 and 8 letters to assure  
110 hippocampal activation and hippocampo-cortical interaction as shown earlier (19).

### 111 **Power spectral density in cortical and hippocampal recordings**

112 To investigate how cortical and hippocampal activity subserves WM processing,  
113 we analyzed sEEG recorded in the hippocampus (**Fig. 1 d**) together with ECoG from  
114 cortical strip electrodes (**Fig. 2 a, Fig. 3 a, f**). In the following, we present power  
115 spectral density (PSD) time-frequency maps from representative electrode contacts.

116 In an occipital recording of Participant 1 (grid contact H3, **Fig. 2 a**), strong gamma  
117 activity (> 40 Hz) in the relative power spectral density (PSD) occurred while the  
118 participant viewed the letters during encoding (**Fig. 2 b**). After the letters  
119 disappeared from the screen, activity occurred in the beta range (12-24 Hz) towards  
120 the end of the maintenance period. In a temporal recording (grid contact C2) gamma  
121 activity occurred during encoding, thus confirming the anatomical localization of this  
122 contact over auditory cortex (supplementary **Fig. S1 a**). Similarly, the temporal scalp  
123 EEG of Participant 2 (electrode site T3, **Fig 3 a**) showed activity during encoding and  
124 maintenance, albeit at lower frequencies (**Fig 3 b**). In Participant 3, a similar pattern  
125 occurred in the PSD of a temporo-parietal recording (most anterior strip electrode  
126 contact, **Fig 3 f**), where the appearance of the probe letter again prompted gamma  
127 activity. This site coincides with the generator of scalp EEG that was found in the  
128 parietal cortex for the same task (3). The PSD thereby confirmed the findings of local  
129 synchronization of cortical activity during WM maintenance (3, 8, 9).

130 In the hippocampus of all three participants, we found elevated activity in the beta  
131 range (12-24 Hz) towards the end of the maintenance period (**Fig 2 c, Fig 3 c,h**),  
132 confirming the hippocampal contribution to processing of this task (19)

### 133 **Directed functional coupling between hippocampus and ECoG**

134 To investigate the functional coupling between cortex and hippocampus, we first  
135 calculated the phase locking value (PLV). During maintenance, we found enhanced  
136 PLV in the beta range (supplementary **Fig. S1 b**). The highest PLV occurred from  
137 the contact C2 over auditory cortex (**Fig 2 d**), which speaks for a functional coupling  
138 between auditory cortex and hippocampus mediated by synchronized oscillations  
139 (24).

140 What was the directionality of the information flow during encoding and  
141 maintenance in a trial? We used spectral Granger causality (GC) as a measure of

142 directed functional connectivity to determine the direction of the information flow  
143 between auditory cortex and hippocampus during the trials. During encoding, the  
144 information flow was from auditory cortex to hippocampus with a maximum in the  
145 beta frequency range (12-24 Hz, dark blue curve in **Fig. 2 e**). During maintenance,  
146 the information flow in the same frequency range was reversed (dark red curve), i.e.  
147 from hippocampus to auditory cortex. Concerning the spatial distribution of the beta  
148 GC, the highest GC during encoding occurred from auditory cortex to hippocampus  
149 (supplementary **Fig. S1 c**). During maintenance, the beta GC was high from  
150 hippocampus to both auditory cortex and parietal cortex (supplementary **Fig. S1 d**).  
151 As a further illustration of the GC time-course, the time-frequency plot shows the  
152 difference between GC spectra ( $\Delta$ Granger) at each time point, where blue indicates  
153 net flow from auditory cortex to hippocampus and red indicates net flow from  
154 hippocampus to auditory cortex **Fig. 2 f**.

155 Similarly in Participant 2, the time course of GC followed the same pattern  
156 between auditory cortex (anterior strip electrode contact in **Fig. 3 a**) and  
157 hippocampus (**Fig. 3 d,e**). Among all participants that had both sEEG and temporo-  
158 parietal ECoG recordings, Participant 3 had an electrode contact over visual cortex;  
159 the sensory localization was indexed by the strong gamma activity (most posterior  
160 contact of the strip electrode in **Fig. 3 f**). The time-course of information flow  
161 between visual cortex and hippocampus (**Fig. 3 i,j**) followed the same pattern as  
162 described for the auditory cortex above. Thus, letters were encoded with information  
163 flow from sensory cortex to hippocampus; conversely, the information flow from  
164 hippocampus to sensory cortex indicated the replay of letters during maintenance.

### 165 **Directed functional coupling between hippocampus and scalp EEG**

166 We then confirmed the directed functional coupling in the whole group of  $N = 15$   
167 participants. We calculated GC between all hippocampal channels and all scalp EEG  
168 electrodes. We present here the electrode pairs with the highest  $\Delta$ Granger values. It  
169 turned out that in each participant, the highest GC occurred in temporal electrodes  
170 over auditory cortex; in participants where temporal sites were not recorded from, the  
171 highest GC occurred at the neighboring electrode sites C3 or C4.

172 The GC time-course in Participant 1 was similar for scalp EEG (**Fig. 4 a**) and  
173 ECoG (**Fig. 2 e**). We found high GC between temporal EEG over auditory cortex  
174 (EEG site T4) and hippocampus. The GC was lower than for ECoG, as expected for

175 the lower signal amplitude of scalp EEG. During encoding, the information flow was  
176 from temporal EEG to hippocampus in the alpha frequency range (dark blue curve).  
177 During maintenance, the information flow range was reversed (dark red curve), i.e.  
178 from hippocampus to auditory cortex. In Participant 2, the information flow was high  
179 from electrode T5 to hippocampus during encoding in the alpha range (dark green  
180 line in **Fig. 4 b**). In Participant 3, the information flow was highest from hippocampus  
181 to electrode T6 during maintenance in the theta range (dark red line in **Fig. 4 c**). Also  
182 for all other participants (**Fig. 4 d-o**), all GC spectra during encoding had frequency  
183 ranges where information flow from cortex to hippocampus (encoding, dark blue  
184 curve) was significantly higher than in the reverse direction (light blue curve) and  
185 where information flow from hippocampus to cortex (maintenance, dark red curve)  
186 was significantly higher than in the reverse direction (light red curve). We then  
187 calculated the time-frequency plots of the  $\Delta$ Granger for each participant; the  
188 averaged plot illustrates the predominant flow from auditory cortex to hippocampus  
189 during encoding (blue) and flow from hippocampus to auditory cortex (red) during  
190 maintenance in the theta-alpha frequency range (4-15 Hz, **Fig. 5a**).

191 Finally, we looked at the effect of behavior on  $\Delta$ Granger. For each participant we  
192 calculated the  $\Delta$ Granger for encoding and maintenance in the respective frequency  
193 bands of significance. For correct trials, the  $\Delta$ Granger was negative during encoding  
194 and positive during maintenance for all 15 participants ( $P = 0.005$ , paired cluster  
195 based permutation test, **Fig. 5 b**). For incorrect trials, the same analysis was not  
196 significant ( $P = 0.0647$ , paired cluster based permutation test, **Fig. 5 c**) for incorrect  
197 trials. This suggests that timely information flow, as indexed by GC, is relevant for  
198 producing a correct response.

## 199 **DISCUSSION**

200 Working memory (WM) describes our capacity to represent sensory input for  
201 prospective use. Our findings suggest that this cognitive function is subserved by  
202 bidirectional oscillatory interactions between the hippocampus and the sensory-  
203 parietal cortex as indicated by phase synchrony and Granger causality. In our verbal  
204 working memory task, the encoding of letter items is isolated from the maintenance  
205 period in which the active rehearsal of memory items is central to achieve correct  
206 performance. First, analysis of task-induced power showed sustained oscillatory



207 activity in cortical and hippocampal sites during the maintenance period. Second,  
208 analysis of the inter-electrode phase synchrony and the directional information flow  
209 showed task-induced interactions between cortical and hippocampal sites. The  
210 oscillations were in the beta band when recorded with intracranial electrodes and,  
211 when recorded with scalp electrodes, extended down to the theta-alpha band. Third,  
212 the directional information flow was from sensory cortex to hippocampus during  
213 encoding and, during maintenance, the reverse flow occurred from hippocampus to  
214 cortex. Fourth, the comparison between correct and incorrect trials suggests that the  
215 participants relied on timely information flow to produce a correct response. Our data  
216 suggests a surprisingly simple model of information flow within a network that  
217 involves sensory cortices and hippocampus (**Fig. 5 d**): During encoding, letter strings  
218 are verbalized as melody. The incoming information flows from sensory cortex to  
219 hippocampus (bottom-up). During maintenance, participants actively recall and  
220 rehearse the melody. The Granger causality indicates the information flow from  
221 hippocampus to cortex (top-down) as the physiological basis for the replay of the  
222 memory items, which finally guides action.

223 The current study is embedded in previous studies using the same or similar  
224 tasks. Persistent firing of hippocampal neurons indicated hippocampal involvement  
225 in the maintenance of memory items (19-21). Parietal generators of theta-alpha EEG  
226 indicated involvement of parietal cortex in WM maintenance (3, 5, 7, 19, 27). The  
227 hippocampo-cortical phase synchrony (PLV) was high during maintenance of the  
228 high workload trials (19). Building on these previous studies, the current study  
229 focused on high workload trials and extended them by the analysis of directional  
230 information flow.

231 In the literature, there are several studies investigating the WM network. However,  
232 only few report directional interactions. One of these (17), reports cross-spectral  
233 directionality between intracranial recordings in frontal cortex and the medial  
234 temporal lobe in theta frequencies. One study on episodic memory suggests  
235 directional information flow to and from hippocampus (28). Interestingly, our  
236 analyses with intracranial recordings from posterior cortex revealed the most salient  
237 findings in the beta frequencies, which is in line with hippocampal findings (15) and  
238 theoretical considerations (29). For scalp EEG, the frequencies of synchronisation  
239 found in the current study also included the theta-alpha frequencies, in line with



240 scalp EEG findings during WM tasks (4, 6) and other tasks (26) that activate  
241 oscillations in long-range recurrent connections (24, 25).

242 In sum, these results corroborated earlier findings on the working memory network  
243 and extended them by providing a physiological mechanism for the active replay of  
244 memory items.

## 245 **METHODS**

### 246 **Task**

247 We used a modified Sternberg task in which the encoding of memory items and  
248 their maintenance were temporally separated (**Fig. 1a**). Each trial started with a  
249 fixation period ([−6, −5] s), followed by the stimulus ([−5, −3] s). The stimulus  
250 consisted of a set of eight consonants at the center of the screen. The middle four,  
251 six, or eight letters were the memory items, which determined the set size for the trial  
252 (4, 6, or 8 respectively). The outer positions were filled with “X,” which was never a  
253 memory item. The participants read the letters and heard them spoken at the same  
254 time. After the stimulus, the letters disappeared from the screen, and the  
255 maintenance interval started ([−3, 0] s). A fixation square was shown throughout  
256 fixation, encoding, and maintenance. After maintenance, a probe was presented.  
257 The participants responded with a button press to indicate whether the probe was  
258 part of the stimulus. The participants was instructed to respond as rapidly as  
259 possible without making errors. After the response, the probe was turned off, and the  
260 participants received acoustic feedback regarding whether the response was correct  
261 or incorrect. The participants performed sessions of 50 trials in total, which lasted  
262 approximately 10 min each. Trials with different set sizes were presented in a  
263 random order, with the single exception that a trial with an incorrect response was  
264 always followed by a trial with a set size of 4. The task can be downloaded at  
265 [www.neurobs.com/ex\\_files/expt\\_view?id=266](http://www.neurobs.com/ex_files/expt_view?id=266).

### 266 **Participants**

267 The participants in the study were patients with drug resistant focal epilepsy. To  
268 investigate a potential surgical treatment of epilepsy, the patients were implanted  
269 with intracranial electrodes. The participants provided written informed consent for  
270 the study, which was approved by the institutional ethics review board (PB 2016-

271 02055). The participants had normal or corrected-to-normal vision. For nine  
272 participants (4 – 13), the PSD and PLV has been reported in an earlier study (19).

### 273 **Electrodes for sEEG, ECoG, and EEG**

274 The depth electrodes (1.3 mm diameter, 8 contacts of 1.6 mm length, spacing  
275 between contact centers 5 mm, ADTech®, Racine, WI, [www.adtechmedical.com](http://www.adtechmedical.com))  
276 were stereotactically implanted into the hippocampus. Subdural grids and strips were  
277 placed directly on the cortex according to the findings of the non-invasive presurgical  
278 evaluations. Platinum electrodes with 4 mm<sup>2</sup> contact surface and 1 cm inter-  
279 electrode distances were used (ADTech®). In addition, scalp EEG electrodes were  
280 placed at the sites of the 10-20 system with minor adaptations to avoid surgical scalp  
281 lesions.

### 282 **Electrode localization**

283 To localize the ECoG grids and strips, we used the participants' postoperative  
284 MR, aligned to CT and produced a 3D reconstruction of the participants' pial brain  
285 surface. Grid/strip electrode coordinates were projected on the pial surface as  
286 described in (30) (**Fig. 2a, Fig. 3a,f**).

287 The stereotactic sEEG electrodes were localized using post-implantation  
288 computed tomography (CT) and post-implantation structural T1- weighted MRI  
289 scans. The CT scan was registered to the post-implantation scan as implemented in  
290 FieldTrip (31). A fused image of CT and MRI scans was produced and the electrode  
291 contacts were marked visually. The contact positions were projected on a  
292 parasagittal plane of MRI (**Fig. 1b**).

### 293 **Recording setup, re-referencing, and preprocessing**

294 All recordings were performed with Neuralynx ATLAS, sampling rate 4000 Hz,  
295 0.5-1000 Hz passband (Neuralynx, Bozeman MT, USA, [www.neuralynx.com](http://www.neuralynx.com)). ECoG  
296 and sEEG were recorded against a common intracranial reference. ECoG was then  
297 re-referenced against a sEEG contact in white matter. For each sEEG electrode,  
298 hippocampal contacts were re-referenced against their closest sEEG contact in white  
299 matter. The scalp EEG was recorded against an electrode near the vertex and was  
300 then re-referenced to the averaged mastoid channels. All signals were downsampled  
301 to 500 Hz. Trials with large unitary artefacts in the scalp EEG were rejected. We

302 focused on trials with high workload (set sizes 6 and 8) for further analysis. We used  
303 the FieldTrip toolbox for data processing and analysis (32).

### 304 **Power spectral density**

305 We first calculated the relative power spectral density (PSD) in the time-frequency  
306 domain (**Fig. 2 b**). Time-frequency maps for all trials were averaged. We used 3  
307 multitapers with a window width of 10 cycles per frequency point, smoothed with 0.2  
308  $\times$  frequency. We computed power in the frequency range 4-100 Hz with a time  
309 resolution of 0.1 s. The PSD during fixation ([-6.0, -5.0] s) served as a baseline for  
310 the baseline correction  $(\text{PSD}(t) - \text{PSD}(\text{fixation})) / \text{PSD}(\text{fixation})$  for each time-  
311 frequency point.

### 312 **Phase locking value**

313 To evaluate the functional connectivity of hippocampus and cortex, we calculated  
314 the phase-locking value (PLV) between hippocampal sEEG channels and ECoG grid  
315 (multitaper frequency transformation with 2 tapers based on Fourier transform,  
316 frequency range 4-100 Hz with frequency resolution of 1 Hz).

$$PLV_{i,j}(f) = \frac{1}{N} \left| \sum_{n=1}^N \frac{X_i(f) \cdot (X_j(f))^*}{|X_i(f)| \cdot |X_j(f)|} \right|$$

317 where  $PLV_{i,j}$  is the PLV between channels  $i,j$ ,  $N$  is the number of trials,  $X(f)$  is the  
318 Fourier transform of  $x(t)$ , and  $(\cdot)^*$  represents the complex conjugate.

319 Using the spectra of the two-second epochs, phase differences were calculated  
320 for each electrode pair ( $i,j$ ) to quantify the inter-electrode phase coupling. The phase  
321 difference between the two signals indexes the coherence between each electrode  
322 pair and is expressed as the PLV. The PLV ranges between 0 and 1, with values  
323 approaching 1 if the two signals show a constant phase relationship over all trials.

324 In our description of EEG frequency bands, we used theta (4-8 Hz), alpha (8-12  
325 Hz), beta (12-24 Hz) and gamma ( $> 40$  Hz), while the exact frequencies may differ in  
326 individual participants.

### 327 **Spectral Granger causality**

328 In order to evaluate the direction of information flow between the hippocampus  
329 and the cortex, we calculated spectral non-parametric Granger causality (GC) as a  
330 measure of directed functional connectivity. GC examines if the activity on one  
331 channel can forecast activity in the target channel. In the spectral domain, GC

332 measures the fraction of the total power that is contributed by the source to the  
333 target. We transformed signals to the frequency domain using the multitaper method  
334 (2 tapers, frequency range 4 to 100 Hz with frequency resolution of 0.5 Hz,  $\pm 2$  Hz  
335 smoothing) to reduce spectral leakage and control the frequency smoothing.

336 We used a non-parametric spectral approach to measure the interaction in the  
337 channel pairs at a given interval time (33). In this approach, the spectral transfer  
338 matrix is obtained from the Fourier transform of the data. We used the FieldTrip  
339 toolbox to factorize the transfer function  $H(f)$  and the noise covariance matrix  $\Sigma$ . The  
340 transfer function and the noise covariance matrix was then employed to calculate the  
341 total and the intrinsic power,  $S(f) = H(f)\Sigma H^*(f)$ , through which we calculated the  
342 Granger interaction in terms of power fractions contributed from the source to the  
343 target.

$$344 \quad GC_{Y \rightarrow X} \rightarrow = \ln \frac{S_{xx}(f)}{\tilde{S}_{xx}(f)}$$

345 where  $S_{xx}(f)$  is the total power and  $\tilde{S}_{xx}(f)$  the instantaneous power. To improve  
346 legibility, we present GC as Granger % =  $GC \cdot 100$  (**Fig. 2 d,e**).

347 To illustrate the time course of GC over time, we calculated time-frequency maps  
348 for the selected pairs with scalp channels and averaged these maps over  
349 participants.

## 350 **Statistics**

351 To analyze statistical significance, we used cluster-based nonparametric  
352 permutation tests. To assess the significance of PLV and GC, we compared the true  
353 values to a null distribution. We recomputed GC after shuffling the trial number for a  
354 single channel in the pair, while keeping the trial number of the other channel  
355 constant. We repeated this  $n = 200$  times to create a null distribution of GC. The null  
356 distribution was exploited to calculate the percentile threshold  $P = 0.05$ . We mark the  
357 frequency range of significant GC with a blue bar for encoding (dark blue spectrum  
358 exceeds light blue spectrum, information flow from cortex to hippocampus) and with  
359 a red bar for maintenance (dark red spectrum exceeds light red spectrum,  
360 information flow from hippocampus to cortex).

361 For comparisons between two groups, we used the paired cluster based  
362 permutation test. We created a null distribution by performing  $N = 200$  random  
363 permutations. The significance threshold was established at  $P = 0.05$ .

## 364 **Acknowledgments**

365 We thank the physicians and the staff at Schweizerische Epilepsie-Klinik for their  
366 assistance and the patients for their participation. We acknowledge grants awarded  
367 by the Swiss National Science Foundation (SNSF 320030\_176222 to J. S.) and  
368 SNSF Ambizione fellowship (PZ00P3\_167836 to P. M.). The funders had no role in  
369 the design or analysis of the study.

370 Author contributions: J.S. designed the experiments. J.S. performed the  
371 experiments. V.D. and J.S. analyzed the data. L.S. performed surgery. P.M.  
372 visualized the grid electrode position, V.D. and J.S. wrote the manuscript. All of the  
373 authors reviewed the final version of the manuscript.

374 Competing interests: All authors declare that they have no competing interests.

375 Ethical considerations: The participant provided written informed consent for the  
376 study, which was approved by the institutional ethics review board (PB 2016-02055).

377 Data availability: All data needed to evaluate the conclusions in the paper are  
378 present in the paper. The task can be downloaded at  
379 [www.neurobs.com/ex\\_files/expt\\_view?id=266](http://www.neurobs.com/ex_files/expt_view?id=266). The raw data will be made publicly  
380 available after acceptance of the manuscript.

## 381 **FIGURE CAPTIONS**

### 382 **Figure 1. Task and recording sites.**

383 a) In the task, sets of consonants are presented and have to be memorized. The set  
384 size (4, 6 or 8 letters) determines WM workload. In each trial, presentation of a  
385 letter string (encoding period, 2 s) is followed by a delay (maintenance period, 3  
386 s). After the delay, a probe letter is presented. Participants indicate whether the  
387 probe was in the letter string or not.

388 b) Response accuracy decreases with set size (71 sessions).

389 c) Reaction time increases with set size (53 ms/item).

390 d) The tip locations of the hippocampal sEEG electrodes for all participants (N = 15)  
391 are projected on the parasagittal plane  $x = 25.2$  mm.

392 **Figure 2. Encoding and replay of letters in Participant 1**

- 393 a) Location of the ECoG contacts over temporal and parietal cortex for Participant 1.  
394 Contacts record from auditory cortex (C2, cyan) and occipital-parietal cortex (H3,  
395 magenta).
- 396 b) The relative power spectral density (PSD) in the parietal contact (magenta)  
397 shows gamma (>40 Hz) during encoding [-5 -3] s while the subject sees and  
398 hears the letters. Sustained beta activity (11-14 Hz) appears towards the end of  
399 the maintenance period [-3 0] s.
- 400 c) Hippocampal PSD shows sustained beta activity towards the end of  
401 maintenance.
- 402 d) Phase locking value (PLV) between cortex and hippocampal sEEG in beta during  
403 maintenance. PLV (16-29 Hz) is maximal in contact C2 over auditory cortex.
- 404 e) Spectral Granger causality. During encoding, auditory cortex (contact C2)  
405 predicts hippocampus (8-18 Hz, dark blue curve exceeds light blue curve). During  
406 maintenance, hippocampal sEEG predicts auditory cortex (8-14 Hz, dark red  
407 curve exceeds light red curve).
- 408 f) The Granger time-frequency map illustrates the spectra of panel e. During  
409 encoding, net information ( $\Delta$ Granger) starts to flow from auditory cortex to  
410 hippocampus (blue). During maintenance the information flow is reversed from  
411 hippocampus to auditory cortex (red) indicating the replay of letters in memory.

412 **Figure 3. Encoding and replay of letters in two participants with ECoG**

- 413 a) Location of the ECoG contacts in Participant 2. The most anterior strip contact  
414 (cyan) records from auditory cortex.
- 415 b) The relative power spectral density (PSD) in the temporal scalp EEG electrode  
416 (T3) shows beta (14-25 Hz) during encoding [-5 -3] s while the subject sees and  
417 hears the letters. Sustained theta activity (6-9 Hz) appears towards the end of  
418 the maintenance period [-3 0] s.
- 419 c) Hippocampal PSD shows sustained alpha-beta activity (9-21 Hz) towards the  
420 end of maintenance.
- 421 d) Spectral Granger causality. During encoding, the auditory cortex predicts  
422 hippocampus (9-16 Hz, dark blue curve exceeds light blue curve). During  
423 maintenance, hippocampal sEEG predicts auditory cortex (9-16 Hz, dark red  
424 curve exceeds light red curve).

- 425 e) The time-frequency map illustrates the time course of  $\Delta$ Granger in Participant 3.  
426 f) Location of the ECoG contacts in Participant 3. The most posterior contact  
427 (cyan) records from visual cortex.  
428 g) The relative power spectral density (PSD) in the blue contact shows gamma  
429 during encoding while the subject sees the letters. Sustained alpha activity (7-12  
430 Hz) appears towards the end of the maintenance period.  
431 h) Hippocampal PSD shows sustained beta activity (13-22 Hz) towards the end of  
432 maintenance.  
433 i) Spectral Granger causality. During encoding, the occipital ECoG (cyan contact)  
434 predicts hippocampus (10-18 Hz, dark blue curve exceeds light blue curve).  
435 During maintenance, hippocampal sEEG predicts ECoG (9-18 Hz, dark red  
436 curve exceeds light red curve).  
437 j) The time-frequency map illustrates the time course of  $\Delta$ Granger in Participant 3.  
438 Bars: frequency range of significant  $\Delta$ Granger ( $p < 0.05$ ), cluster-based  
439 nonparametric permutation test against a null distribution with scrambled trials during  
440 encoding (dark blue) and maintenance (dark red), respectively.

441 **Figure 4. Granger causality between hippocampal sEEG and scalp EEG**

442 Granger causality spectra for hippocampal sEEG and scalp EEG for the electrode  
443 pair with maximal Granger causality for all participants (N=15). During encoding, the  
444 net Granger ( $\Delta$ Granger) indicates information flow from scalp EEG to hippocampal  
445 sEEG (blue bar). During maintenance,  $\Delta$ Granger indicates information flow from  
446 hippocampal sEEG to scalp EEG to (red bar). Each panel carries the name of the  
447 scalp EEG electrode site.  
448 Bars: frequency range of significant  $\Delta$ Granger ( $p < 0.05$ ), cluster-based nonparametric  
449 permutation test against a null distribution with scrambled trials during encoding  
450 (dark blue) and maintenance (dark red), respectively. Colors of Granger spectra  
451 indicating information flow:  
452 dark blue, EEG to hippocampus during encoding;  
453 light blue, hippocampus to EEG during encoding;  
454 dark red, hippocampus to EEG during maintenance;  
455 light red, EEG to hippocampus during maintenance.



456 **Figure 5. Information flow in the working memory network relates to**  
457 **behavior.**

- 458 a) The time-frequency map of net Granger causality ( $\Delta$ Granger), averaged over all  
459 N=15 participants, illustrates the time course of the information flow from scalp  
460 EEG to hippocampus (blue) during encoding and from hippocampus to scalp EEG  
461 (red) during maintenance.
- 462 b) For correct trials, the maximal  $\Delta$ Granger is negative during encoding (blue, cortex  
463  $\rightarrow$  hippocampus) and positive during maintenance (red, hippocampus  $\rightarrow$  cortex)  
464 for all participants (triangles: pairs with scalp EEG, circles: pairs with ECoG,  $P =$   
465 0.005, paired cluster based permutation test).
- 466 c) For incorrect trials, the maximal  $\Delta$ Granger is highly variable ( $P = 0.0647$ , paired  
467 cluster based permutation test, not significant).
- 468 d) Bidirectional information flow between posterior cortical sites and hippocampus in  
469 the working memory network. The data suggest a surprisingly simple model of  
470 information flow during the task. During encoding, letter strings are verbalized as a  
471 melody. The incoming information flows from sensory cortex to hippocampus.  
472 During maintenance, participants actively recall and rehearse the melody. The  
473 Granger causality indicates the information flow from hippocampus to cortex as  
474 the physiological basis for the replay of the memory items.

475

476 **Figure S1. Further analyses in Participant 1**

- 477 a) The relative power spectral density (PSD) in the temporal contact (grid contact  
478 C2, cyan in Figure 2 a) shows gamma ( $>40$  Hz) during encoding [-5 -3] s while the  
479 subject sees and hears the letters, thus confirming the anatomical location of this  
480 contact over auditory cortex.
- 481 b) Phase locking value (PLV) between hippocampus and grid contact C2. To  
482 assess the significance of the difference of the PLV between different task  
483 periods, we used the same permutation test as for the evaluation of significance  
484 for Granger causality. We mark the frequency range of significant PLV (18-30 Hz)  
485 with a red bar when the PLV spectrum during maintenance (red spectrum)  
486 exceeds the PLV spectrum during fixation (black spectrum).
- 487 c) Spectral Granger causality during encoding. In the 8-18 Hz range, auditory  
488 cortex (contact C2) is maximal in predicting hippocampus.

489 d) Spectral Granger causality during maintenance. In the 8-14 Hz range,  
490 hippocampus predicts auditory cortex (contact C2) and parietal cortex (contact  
491 F7). Axis labels denote contact names.

## 492 REFERENCES

493

- 494 1. Baddeley A (2003) Working memory: looking back and looking forward. *Nat*  
495 *Rev Neurosci* 4(10):829-839.
- 496 2. Christophel TB, Klink PC, Spitzer B, Roelfsema PR, & Haynes J-D (2017) The  
497 Distributed Nature of Working Memory. *Trends in Cognitive Sciences*  
498 21(2):111-124.
- 499 3. Michels L, Moazami-Goudarzi M, Jeanmonod D, & Sarnthein J (2008) EEG  
500 alpha distinguishes between cuneal and precuneal activation in working  
501 memory. *NeuroImage* 40(3):1296-1310.
- 502 4. Sarnthein J, Petsche H, Rappelsberger P, Shaw GL, & von Stein A (1998)  
503 Synchronization between prefrontal and posterior association cortex during  
504 human working memory. *Proc Natl Acad Sci U S A* 95(12):7092-7096.
- 505 5. Tuladhar AM, *et al.* (2007) Parieto-occipital sources account for the increase  
506 in alpha activity with working memory load. *Hum Brain Mapp* 28(8):785-792.
- 507 6. Polania R, Nitsche MA, Korman C, Batsikadze G, & Paulus W (2012) The  
508 importance of timing in segregated theta phase-coupling for cognitive  
509 performance. *Curr Biol* 22(14):1314-1318.
- 510 7. Näpflin M, Wildi M, & Sarnthein J (2008) Test-retest reliability of EEG spectra  
511 during a working memory task. *NeuroImage* 43(4):687-693.
- 512 8. Bidelman GM, Brown JA, & Bashivan P (2021) Auditory cortex supports  
513 verbal working memory capacity. *Neuroreport* 32(2):163-168.
- 514 9. Pavlov YG & Kotchoubey B (2020) Oscillatory brain activity and maintenance  
515 of verbal and visual working memory: A systematic review.  
516 *Psychophysiology*:e13735.
- 517 10. Cogan GB, *et al.* (2017) Manipulating stored phonological input during verbal  
518 working memory. *Nat Neurosci* 20(2):279-286.
- 519 11. Raghavachari S, *et al.* (2001) Gating of human theta oscillations by a working  
520 memory task. *J Neurosci* 21(9):3175-3183.
- 521 12. Rizzuto DS, *et al.* (2003) Reset of human neocortical oscillations during a  
522 working memory task. *Proceedings of the National Academy of Sciences*  
523 100(13):7931-7936.
- 524 13. Maris E, van Vugt M, & Kahana M (2011) Spatially distributed patterns of  
525 oscillatory coupling between high-frequency amplitudes and low-frequency  
526 phases in human iEEG. *NeuroImage* 54(2):836-850.
- 527 14. van Vugt MK, Schulze-Bonhage A, Litt B, Brandt A, & Kahana MJ (2010)  
528 Hippocampal gamma oscillations increase with memory load. *J Neurosci*  
529 30(7):2694-2699.
- 530 15. Leszczyński M, Fell J, & Axmacher N (2015) Rhythmic Working Memory  
531 Activation in the Human Hippocampus. *Cell Rep* 13(6):1272-1282.
- 532 16. Schwiedrzik CM, *et al.* (2018) Medial prefrontal cortex supports perceptual  
533 memory. *Current Biology* 28(18):R1094-R1095.

- 534 17. Johnson EL, *et al.* (2018) Dynamic frontotemporal systems process space  
535 and time in working memory. *PLoS Biology* 16(3):e2004274.
- 536 18. Johnson EL, *et al.* (2019) Spectral Imprints of Working Memory for Everyday  
537 Associations in the Frontoparietal Network. *Front Syst Neurosci* 12:65.
- 538 19. Boran E, *et al.* (2019) Persistent hippocampal neural firing and hippocampal-  
539 cortical coupling predict verbal working memory load. *Sci Adv* 5(3):eaav3687.
- 540 20. Kamiński J, *et al.* (2017) Persistently active neurons in human medial frontal  
541 and medial temporal lobe support working memory. *Nat Neurosci* 20(4):590-  
542 601.
- 543 21. Kornblith S, Quiñero R, Koch C, Fried I, & Mormann F (2017)  
544 Persistent Single-Neuron Activity during Working Memory in the Human  
545 Medial Temporal Lobe. *Curr Biol* 27(7):1026-1032.
- 546 22. Rutishauser U, Reddy L, Mormann F, & Sarnthein J (2021) The Architecture  
547 of Human Memory: Insights from Human Single-Neuron Recordings. *The*  
548 *Journal of Neuroscience* 41(5):883-890.
- 549 23. Hsieh LT & Ranganath C (2014) Frontal midline theta oscillations during  
550 working memory maintenance and episodic encoding and retrieval.  
551 *NeuroImage* 85 Pt 2:721-729.
- 552 24. Fries P (2015) Rhythms for Cognition: Communication through Coherence.  
553 *Neuron* 88(1):220-235.
- 554 25. Pesaran B, *et al.* (2018) Investigating large-scale brain dynamics using field  
555 potential recordings: analysis and interpretation. *Nat Neurosci* 21(7):903-919.
- 556 26. Solomon EA, *et al.* (2017) Widespread theta synchrony and high-frequency  
557 desynchronization underlies enhanced cognition. *Nat Commun* 8(1):1704.
- 558 27. Boran E, *et al.* (2020) Dataset of human medial temporal lobe neurons, scalp  
559 and intracranial EEG during a verbal working memory task. *Sci Data* 7(1):30.
- 560 28. Griffiths BJ, *et al.* (2019) Directional coupling of slow and fast hippocampal  
561 gamma with neocortical alpha/beta oscillations in human episodic memory.  
562 *Proc Natl Acad Sci U S A* 116(43):21834-21842.
- 563 29. Gelastopoulos A, Whittington MA, & Kopell NJ (2019) Parietal low beta  
564 rhythm provides a dynamical substrate for a working memory buffer. *Proc Natl*  
565 *Acad Sci U S A* 116(33):16613-16620.
- 566 30. Groppe DM, *et al.* (2017) iELVis: An open source MATLAB toolbox for  
567 localizing and visualizing human intracranial electrode data. *J Neurosci*  
568 *Methods* 281:40-48.
- 569 31. Stolk A, *et al.* (2017) Integrated analysis of anatomical and  
570 electrophysiological human intracranial data. *bioRxiv*.
- 571 32. Oostenveld R, Fries P, Maris E, & Schoffelen J-M (2011) FieldTrip: Open  
572 Source Software for Advanced Analysis of MEG, EEG, and Invasive  
573 Electrophysiological Data. *Computational Intelligence and Neuroscience*  
574 2011:9.
- 575 33. Bastos AM & Schoffelen J-M (2016) A Tutorial Review of Functional  
576 Connectivity Analysis Methods and Their Interpretational Pitfalls. *Frontiers in*  
577 *systems neuroscience* 9:175-175.
- 578

**a**

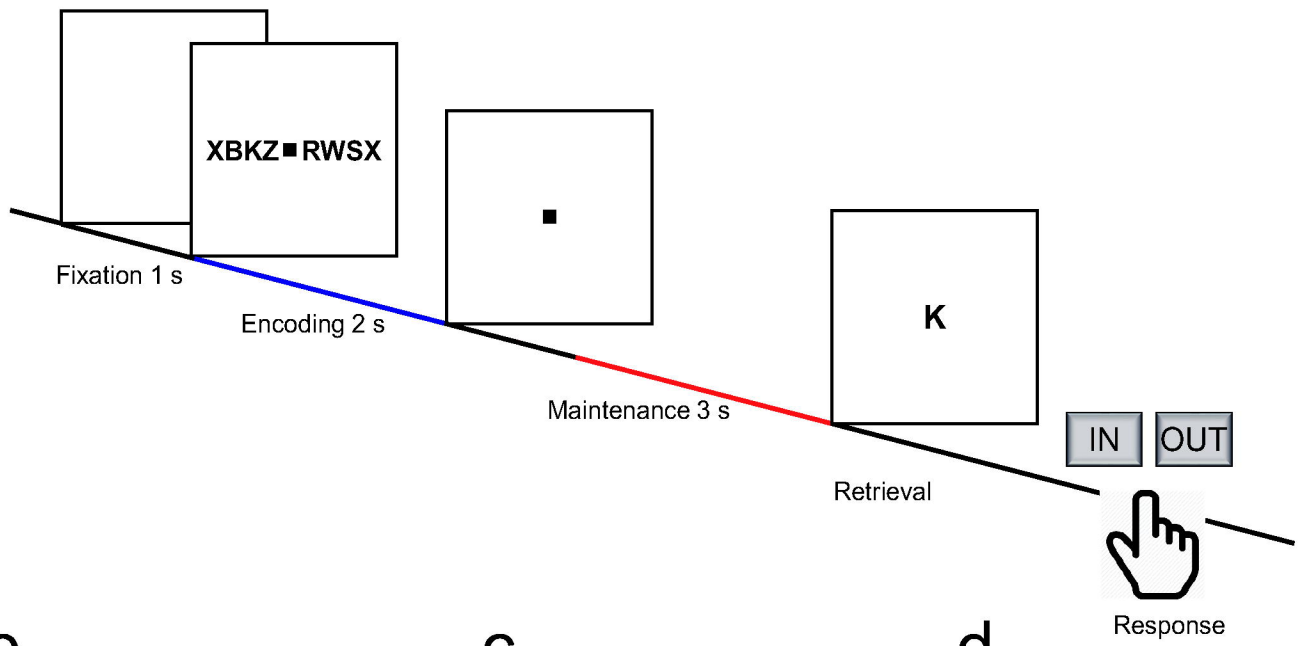

**b**

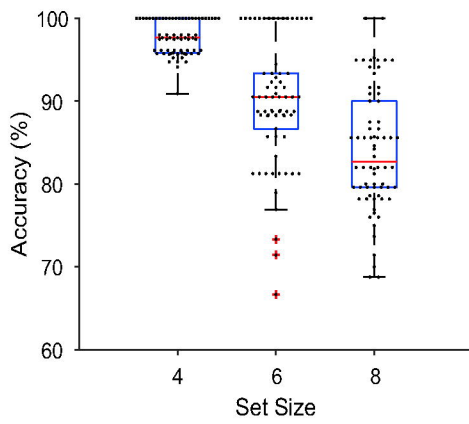

**c**

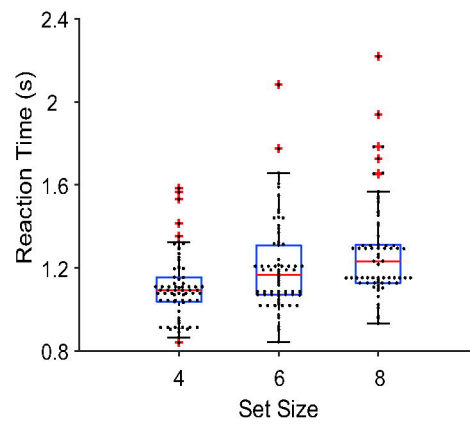

**d**

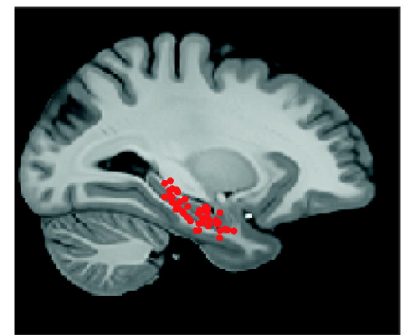

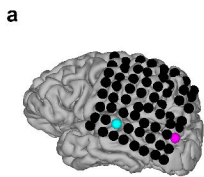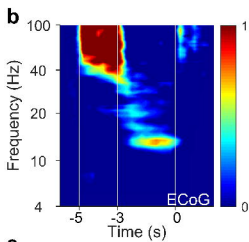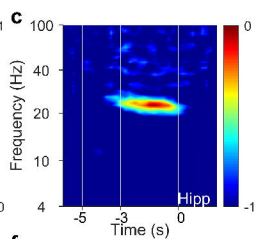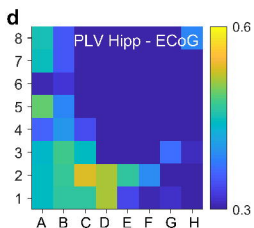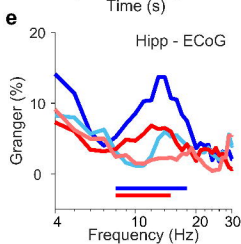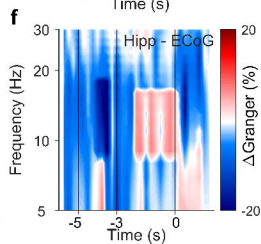

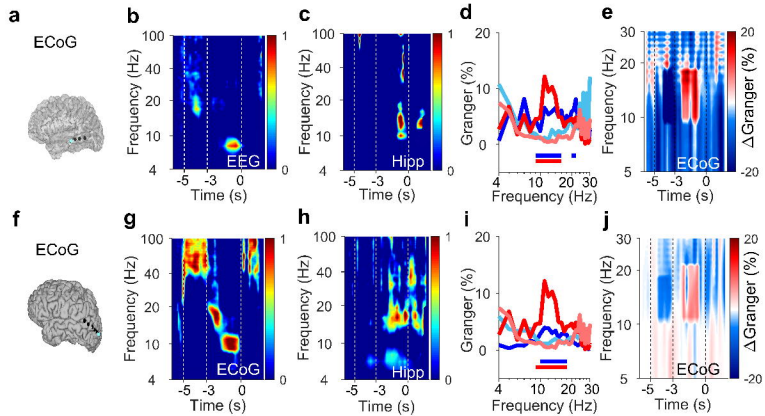

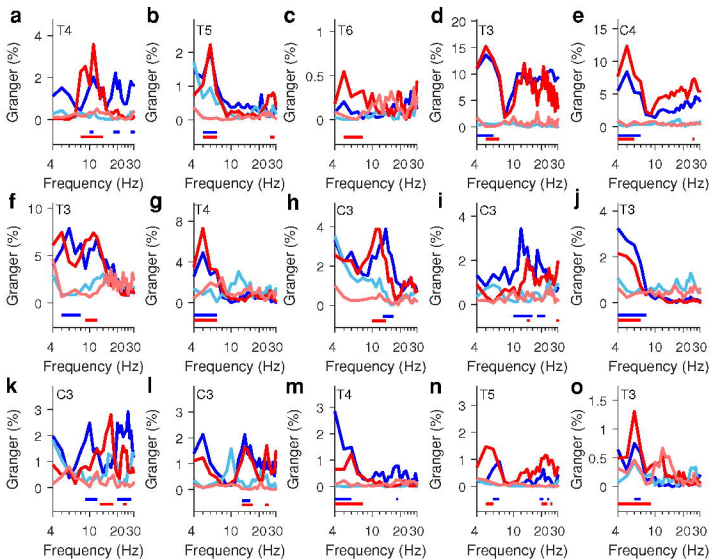



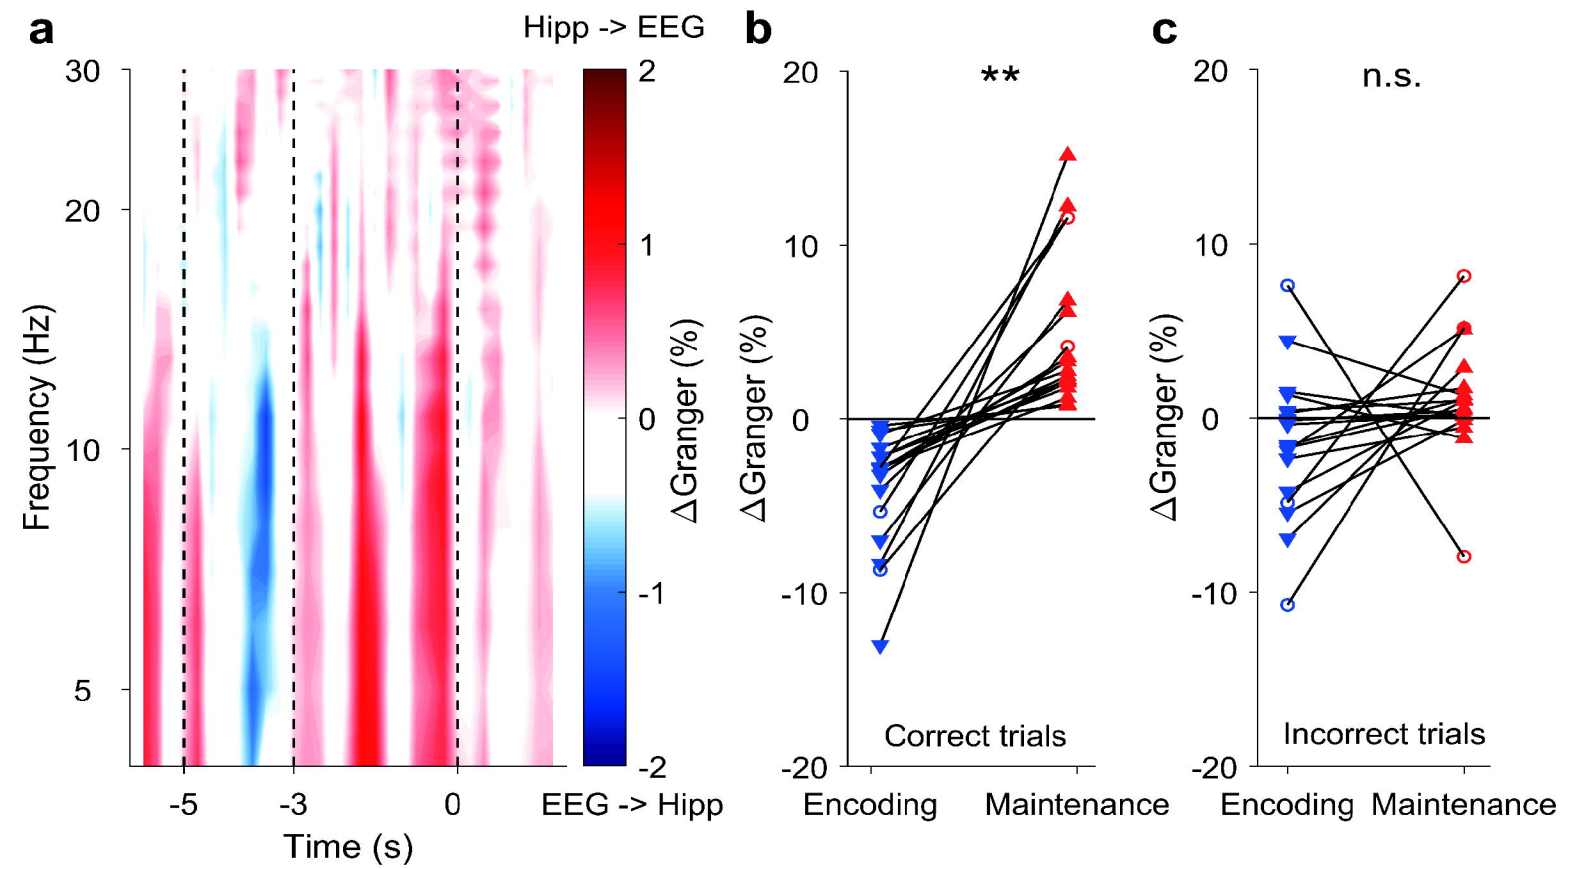

**d**

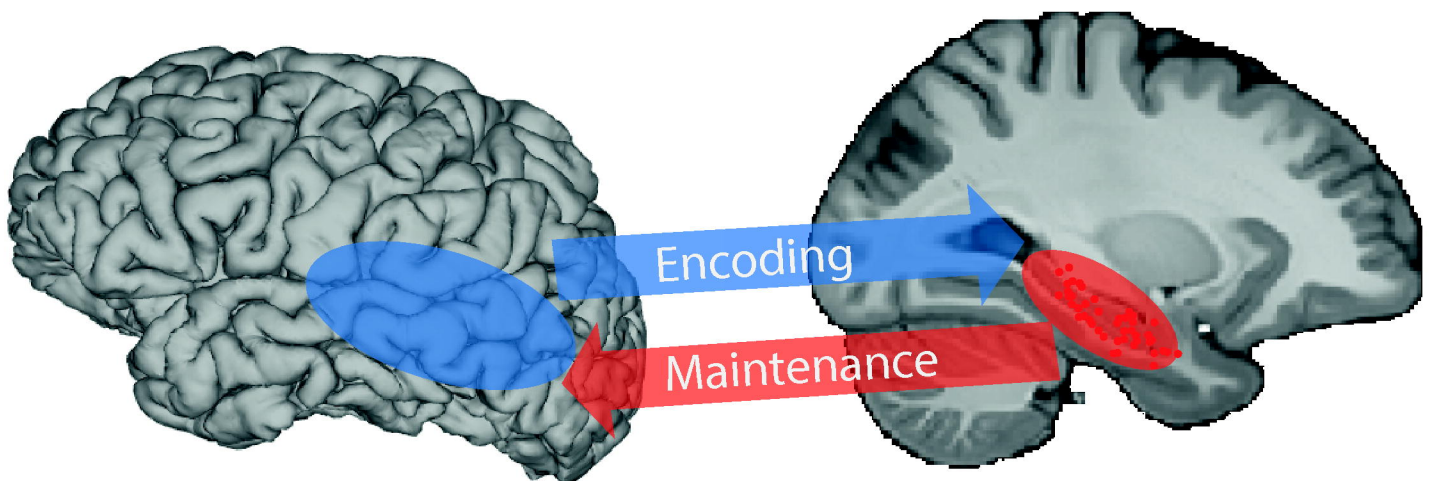

Source: https://www.biorxiv.org/content/10.1101/2021.03.11.434989v1.full.pdf
